# Supplementary material
Source: PubMed Central journal article supplement (PMC5072442)

## 1. Supplementary data

### 1.1 Supplementary Figures

**Supplementary figure 1. Establishment of stable cell lines expressing pEGFP-p130Cas or pEGFP-C1.** After transfection of pEGFP-p130Cas or pEGFP-C1, MCF7 cells were cultured in DMEM/10% FBS media containing 0.5 mg/ml of G418 and colonies were isolated 2 weeks later. Stable expression of EGFP-p130Cas or EGFP was assessed by fluoromicroscopy (a) or western blot analysis using anti-GEP antibody (b).

**Supplementary figure 2. Establishment of stable cell lines expressing miR-362-3p or miR-329.** After transfection of MCF7 cells with plasmids encoding hsa-miR-362-3p or has-miR-329 with its empty plasmid, cells were cultured in DMEM/10% FBS media containing 0.1 mg/ml of Zeocin and colonies were isolated 2 weeks later. Expression of miR-362-3p/miR-329 and p130Cas was assessed by RT-qPCR (a) and western blot analysis (b), respectively.

**Supplementary figure 3. Schematic diagram of genomic locus of miR-362 gene.** miR-362 is an intronic miRNA and encoded in the intron 3 of *CLCN5* in chromosome X. CpG islands on the promoter region of *CLCN5* are shown as gray boxes and PCR amplicon (under bar) contains 17 CpG sequences.

**Supplementary figure 4. Schematic diagram of genomic locus of miR-329 gene.** miR-329 is an intergenic miRNA and encoded in chromosome 14 as two copies (miR-329-1 and miR-329-2, respectively). Promoter region of miR-329 gene is not identified and there were no CpG islands on the upstream region of miR-329 upto 20 kb. Primers listed in Table 1 generated two descriptive products;

upper band (arrow), pri-miR-329-1 + miR-329-2 (567 bp); lower band (arrow head), miR-329-1 (162 bp).

Supplementary figure 1.

**a**

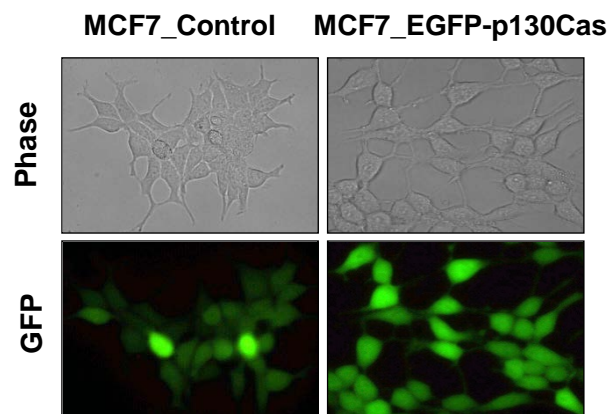

**b**

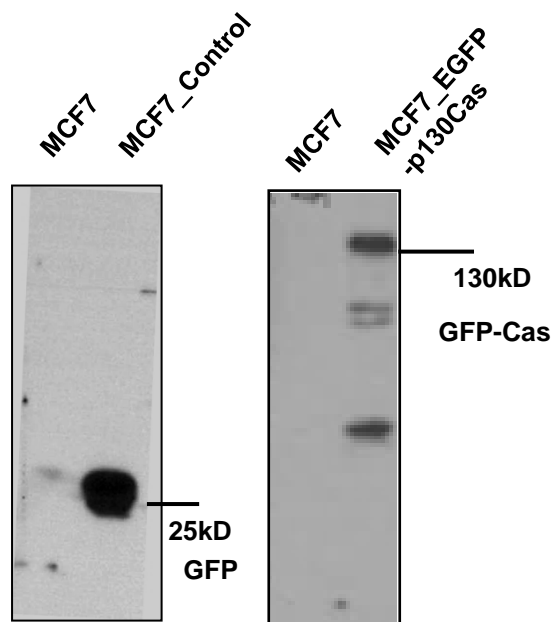

Supplementary figure 2.

**a**

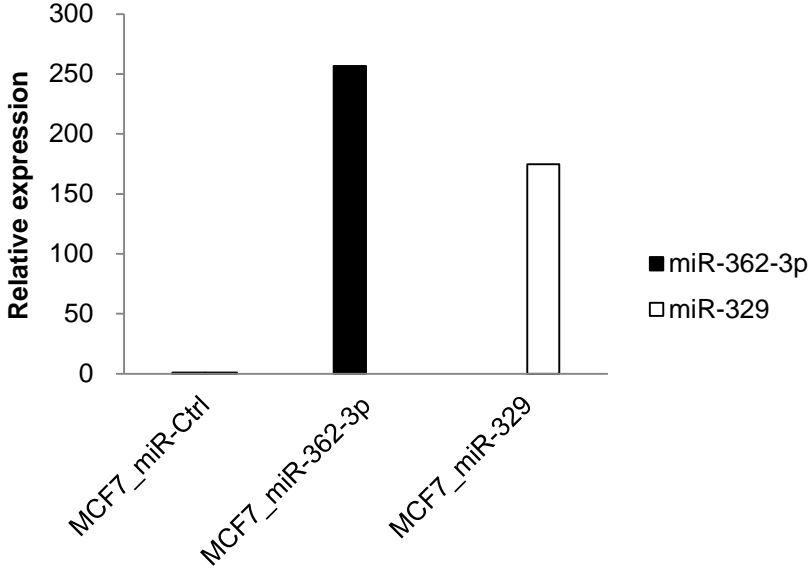

**b**

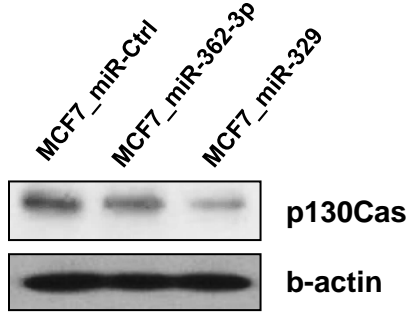

Supplementary figure 3.

Chromosome X - NC\_000023.11

CLCN5 (49,922,615 – 50,099,235)

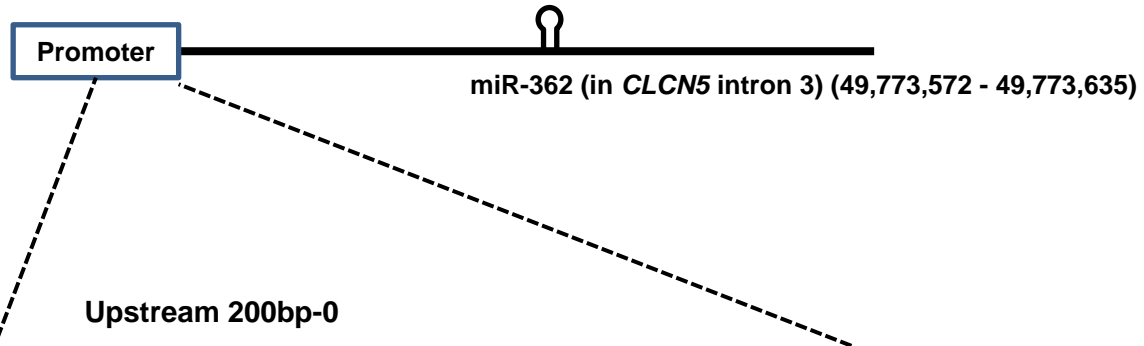

5`cggataggacc **cg**cc**cg**ccagtcctcattaaatatggcag **cg**ag**cg**gggc**cg**a**cg**tactg **cg**gctg **cg**ca  
 1 2 3 4 5 6  
 agttgaaactcctcctggcagctcctccc **cg**g**cg**ggcctcccctcatct **cg**gctgggtagaggtgc **cg**ggtgt  
 7 8 9 10  
 gagct **cg**g**cg**tgg **cg**cg**ca** **cg**cg**caga** **cg**ctggctgggctgagc **cg**atact **cg**cgagg **cg**ccct 3`  
 11 12 1314 1516 17

■ : CpG    Under bar : PCR amplicon    Bold: Primer sequence

Supplementary figure 4.

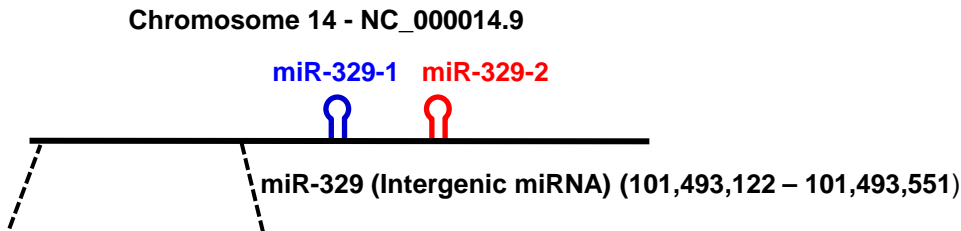

Upstream 200000 - 0bp  
CpG island is not detected

miR-329 (miR-329-1 and miR-329-2)

chr14:101493100-101493551

GGTACCTGAAGAGAGGTTTTCTGGGTTTCTGTTTCTTTAATGAGGACGAAACACACC  
 TGGTTAACCTCTTTTCCAGTATCaaatcccatcctggaggccttctgggtccagacct  
 cagcttcaggaagggcgttactctcagctccagtcactggacagaaatctatggt  
 taaccacgaagcctgtgctgtattatcttgactgatgtcatctgcttactaacc  
 agtgccaatccgtaattaacaggacttccaggactgaatgtcaagtttggggaagg  
 aatcagtggtgttcttgtcagtggttacttgggtGGTACCTGAAGAGAGGTTTTCTGGG  
 TTTCTGTTTCTTTAATGAGGACGAAACACACCCTGGTTAACCTCTTTTCCAGTATC

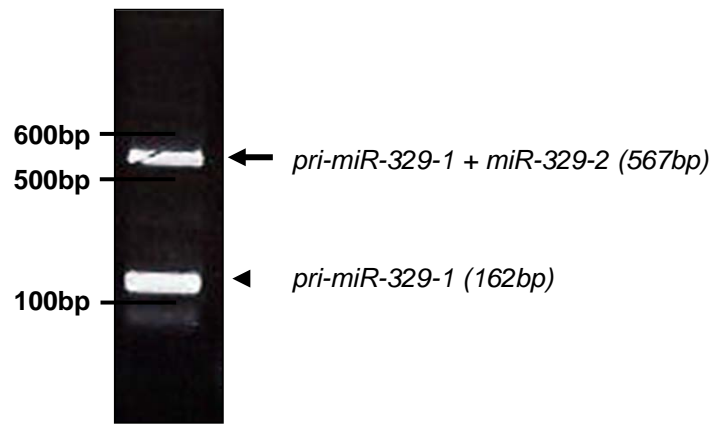

Supplement: cdd2015116x1.pdf [file cdd2015116x1.pdf]
